# Supplementary material
Source: PubMed Central journal article supplement (PMC4438324)
Supplement: ismej2014222x3.pdf [file ismej2014222x3.pdf]

Supplementary Table S1. Environmental variables from water chemistry and biofilms. BDL = Below Detection Level, which was determined as three times the standard deviation of blank measurements divided by the external standard's slope. NA = sample not available. Site labels are MRU (unmined), MRM (mainstem mined), AVF (actively mined valley fill), and RVF (restored valley fill).

| Site                      | MRUI1   | MRUI2   | MRUI3   | MRUI4   | MRUu1   | MRUt1   | MRM1    | MRM3    | MRM4    | MRM5    | MRM6    | MRM7    |
|---------------------------|---------|---------|---------|---------|---------|---------|---------|---------|---------|---------|---------|---------|
| Percent Watershed Mined   | 0.00    | 0.00    | 0.00    | 0.00    | 0.00    | 0.00    | 16.45   | 25.27   | 34.61   | 39.20   | 40.77   | 49.55   |
| Mean Conductivity (µS/cm) | 103.27  | 101.93  | 98.13   | 140.90  | 155.45  | 189.77  | 373.07  | 726.33  | 923.33  | 938.33  | 935.67  | 1260.33 |
| Percent Decomposition     | 0.12    | 0.08    | 0.10    | 0.05    | 0.09    | 0.05    | 0.07    | 0.05    | 0.06    | 0.03    | 0.06    | 0.14    |
| Temperature °(C)          | 10.70   | 12.00   | 11.90   | 17.60   | NA      | 16.30   | 19.00   | 18.10   | 15.40   | 17.30   | 16.90   | NA      |
| Mean pH                   | 8.15    | 8.64    | 8.60    | 8.45    | 7.85    | 6.92    | 7.62    | 8.04    | 7.93    | 7.74    | 7.68    | 7.47    |
| Mean NPOC (mg/L)          | 2.00    | 1.90    | 1.97    | 2.83    | 1.81    | 1.37    | 2.19    | 2.43    | 2.79    | 2.84    | 2.85    | 3.21    |
| Mean TN (mg/L)            | 0.57    | 0.64    | 0.58    | 1.88    | 0.81    | 0.52    | 1.23    | 1.92    | 1.64    | 1.44    | 1.41    | 2.89    |
| Mean Cl (mg/L)            | 6.79    | 6.61    | 6.34    | 4.85    | 8.85    | 12.57   | 2.57    | 2.51    | 2.27    | 2.06    | 2.14    | 2.14    |
| Mean SO4 (mg/L)           | 14.46   | 13.45   | 13.48   | 13.39   | 35.34   | 176.94  | 140.69  | 346.92  | 466.51  | 479.99  | 480.48  | 608.10  |
| Mean NO3-N (mg/L)         | 0.43    | 0.50    | 0.42    | 1.68    | 0.74    | 2.12    | 0.60    | 1.46    | 1.02    | 0.80    | 0.76    | 1.86    |
| Mean Ca (mg/L)            | 10.69   | 10.66   | 10.06   | 10.48   | 10.42   | 3.31    | 32.17   | 62.16   | 83.85   | 87.62   | 89.34   | 131.52  |
| Mean Mg (mg/L)            | 3.39    | 3.38    | 3.23    | 3.55    | 5.66    | 2.39    | 25.33   | 58.58   | 78.78   | 84.38   | 84.55   | 104.77  |
| Mean Na (mg/L)            | 5.64    | 5.39    | 5.21    | 3.96    | 6.73    | 1.16    | 5.69    | 5.82    | 7.03    | 7.03    | 7.49    | 8.40    |
| Mean Fe (µg/L)            | 172.17  | 152.79  | 252.00  | 275.31  | 105.07  | 30.16   | 108.42  | 48.62   | 39.47   | 36.67   | 17.31   | 19.50   |
| Mean Ba (µg/L)            | 52.90   | 55.42   | 48.17   | 47.61   | 43.93   | 47.58   | 44.62   | 34.67   | 34.26   | 33.10   | 41.02   | 32.06   |
| Mean Mn (µg/L)            | 60.26   | 61.38   | 101.55  | 304.29  | 473.76  | 17.67   | 125.03  | 182.93  | 169.48  | 139.80  | 144.05  | 145.59  |
| Mean Al (µg/L)            | 27.33   | 35.39   | 18.96   | 22.22   | 19.11   | 23.84   | 22.19   | 12.06   | 34.68   | 16.06   | 18.35   | 15.75   |
| Mean V (µg/L)             | 0.29    | 0.26    | 0.27    | 0.24    | 0.24    | 0.15    | 0.26    | 0.16    | 0.13    | 0.13    | 0.12    | 0.09    |
| Mean Co (µg/L)            | 0.23    | 0.44    | 0.44    | 0.42    | 1.69    | 0.11    | 0.34    | 0.47    | 0.48    | 0.43    | 0.37    | 0.45    |
| Mean Ni (µg/L)            | 0.56    | 0.55    | 0.89    | 0.75    | 5.37    | 0.70    | 1.64    | 2.28    | 3.82    | 2.93    | 2.96    | 4.31    |
| Mean Cu (µg/L)            | 0.69    | 2.93    | 6.50    | 0.46    | 0.39    | 3.25    | 1.05    | 0.49    | 0.94    | 0.70    | 0.27    | 1.10    |
| Mean Zn (µg/L)            | 13.15   | 28.69   | 18.25   | 19.12   | 21.06   | 6.32    | 15.91   | 7.04    | 18.33   | 14.20   | 4.37    | 13.55   |
| Mean Se (µg/L)            | 0.06    | 0.41    | 0.27    | 0.20    | 0.36    | 0.43    | 1.85    | 4.02    | 4.85    | 5.50    | 5.81    | 9.49    |
| Mean U (µg/L)             | 0.00    | 0.00    | 0.00    | 0.00    | 0.00    | 0.00    | 0.43    | 0.96    | 1.45    | 1.67    | 1.77    | 2.82    |
| Mean Sr (µg/L)            | 51.09   | 49.48   | 49.00   | 52.54   | 55.57   | 29.59   | 140.58  | 259.50  | 302.40  | 323.05  | 351.41  | 671.34  |
| Mean Si (mg/L)            | 3.13    | 3.12    | 3.23    | 3.55    | 4.19    | 2.72    | 3.32    | 2.78    | 2.73    | 2.44    | 2.49    | 2.10    |
| Mean Li (µg/L)            | 0.43    | 0.43    | 0.38    | 0.42    | 3.38    | 0.48    | 4.48    | 10.19   | 13.37   | 14.50   | 14.60   | 21.83   |
| Mean B (µg/L)             | 11.13   | 11.00   | 11.32   | 20.11   | 8.44    | 9.41    | 10.97   | 12.73   | 23.23   | 12.79   | 18.07   | 24.13   |
| Mean Cr (µg/L)            | 0.24    | 0.22    | 0.35    | 0.13    | 0.12    | 0.01    | 0.20    | 0.02    | 0.19    | 0.18    | 0.02    | 0.04    |
| Biofilm C (µg/g dw)       | 54.39   | 64.73   | 120.85  | 35.45   | 239.81  | 168.19  | 46.18   | 53.81   | 31.42   | 57.00   | 70.04   | 35.40   |
| Biofilm Be (µg/g dw)      | 0.55    | 0.71    | 0.55    | 0.96    | 1.01    | 0.53    | 0.56    | 0.57    | 0.41    | 0.54    | 0.56    | 0.62    |
| Biofilm Na (mg/g dw)      | 35.04   | 54.20   | 37.01   | 57.75   | 41.41   | 36.54   | 36.99   | 30.75   | 33.53   | 43.83   | 57.35   | 71.97   |
| Biofilm Mg (mg/g dw)      | 932.80  | 1085.98 | 889.59  | 1724.57 | 1098.76 | 769.87  | 2209.42 | 2305.23 | 1735.33 | 2015.30 | 2150.77 | 2645.19 |
| Biofilm Al (µg/g dw)      | 3430.57 | 4627.29 | 3572.38 | 4776.43 | 4377.56 | 2771.22 | 4508.65 | 4309.23 | 3391.57 | 3546.79 | 4244.17 | 4728.71 |
| Biofilm K (mg/g dw)       | 870.93  | 1029.29 | 761.71  | 1106.23 | 870.36  | 629.76  | 1025.04 | 976.44  | 797.68  | 950.87  | 1008.65 | 1276.28 |
| Biofilm Ca (mg/g dw)      | 1066.93 | 1100.53 | 870.07  | 900.64  | 982.43  | 519.44  | 1919.21 | 2756.32 | 1770.96 | 2713.77 | 2617.91 | 3002.49 |
| Biofilm V (µg/g dw)       | 8.18    | 9.71    | 8.03    | 9.11    | 7.22    | 7.28    | 8.62    | 8.11    | 6.62    | 6.96    | 7.99    | 8.68    |
| Biofilm Cr (µg/g dw)      | 6.77    | 8.22    | 6.76    | 7.40    | 5.65    | 6.68    | 7.17    | 6.61    | 6.30    | 6.07    | 6.75    | 7.22    |
| Biofilm Mn (µg/g dw)      | 609.27  | 786.81  | 533.68  | 524.94  | 1666.82 | 469.80  | 656.72  | 679.30  | 373.20  | 554.62  | 907.78  | 1635.77 |
| Biofilm Fe (mg/g dw)      | 14.69   | 16.38   | 14.89   | 16.39   | 13.45   | 17.74   | 15.44   | 14.55   | 12.82   | 13.76   | 14.33   | 16.03   |
| Biofilm Co (µg/g dw)      | 8.24    | 9.47    | 6.96    | 7.82    | 13.78   | 5.44    | 7.55    | 7.37    | 5.61    | 6.44    | 8.04    | 10.91   |
| Biofilm Ni (µg/g dw)      | 10.20   | 11.75   | 9.65    | 12.96   | 16.57   | 9.07    | 12.47   | 13.45   | 9.74    | 12.86   | 15.24   | 16.36   |
| Biofilm Cu (µg/g dw)      | 8.81    | 8.98    | 6.46    | 7.62    | 6.02    | 9.32    | 7.46    | 7.91    | 5.41    | 6.79    | 8.38    | 8.48    |
| Biofilm Zn (µg/g dw)      | 42.46   | 46.81   | 33.61   | 44.49   | 51.33   | 29.82   | 41.52   | 43.55   | 26.42   | 39.39   | 40.87   | 44.80   |
| Biofilm As (µg/g dw)      | 2.31    | 2.98    | 2.88    | 3.02    | 2.94    | 2.77    | 2.84    | 2.63    | 2.69    | 2.49    | 2.70    | 3.00    |
| Biofilm Sr (µg/g dw)      | 6.88    | 9.26    | 7.65    | 6.52    | 5.63    | 5.83    | 6.35    | 7.70    | 5.15    | 8.00    | 7.73    | 11.89   |
| Biofilm Mo (µg/g dw)      | 0.13    | 0.21    | 0.14    | 0.09    | 0.12    | 0.25    | 3.60    | 0.09    | 0.06    | 0.19    | 1.72    | 0.15    |
| Biofilm Cd (µg/g dw)      | 0.13    | 0.13    | 0.09    | 0.09    | 0.12    | 0.06    | 0.10    | 0.10    | 0.07    | 0.12    | 0.10    | 0.12    |
| Biofilm Ba (µg/g dw)      | 74.39   | 89.88   | 63.15   | 47.05   | 50.83   | 79.81   | 46.56   | 41.81   | 32.19   | 39.79   | 42.53   | 53.96   |
| Biofilm Pb (µg/g dw)      | 13.32   | 12.98   | 10.09   | 9.51    | 6.97    | 15.97   | 9.17    | 8.74    | 7.60    | 7.76    | 8.67    | 10.12   |
| Biofilm Th (µg/g dw)      | 4.74    | 5.38    | 8.04    | 6.74    | 4.26    | 5.31    | 7.04    | 5.19    | 8.84    | 4.57    | 4.86    | 8.05    |
| Biofilm U (µg/g dw)       | 0.64    | 0.74    | 0.84    | 1.13    | 0.49    | 0.57    | 0.91    | 0.73    | 0.93    | 0.63    | 0.61    | 0.73    |

| Site                      | MRM8    | MRM9    | MRM10   | AVF1    | AVF2     | AVF3     | AVF4     | AVF5     | AVF6    | RVF1    | RVF2     |
|---------------------------|---------|---------|---------|---------|----------|----------|----------|----------|---------|---------|----------|
| Percent Watershed Mined   | 50.27   | 50.69   | 50.96   | 33.88   | 77.74    | 91.30    | 95.87    | 55.03    | 57.61   | 31.21   | 86.41    |
| Mean Conductivity (µS/cm) | 1222.33 | 1230.67 | 1241.67 | 542.00  | 1217.67  | 1267.00  | 1991.67  | 1537.33  | 894.33  | 872.00  | 1516.00  |
| Percent Decomposition     | 0.09    | 0.07    | 0.07    | 0.07    | 0.07     | 0.04     | -0.14    | 0.06     | 0.04    | 0.06    | 0.05     |
| Temperature °(C)          | 16.80   | 17.10   | 16.50   | 11.40   | 15.20    | 19.60    | NA       | 15.90    | 18.00   | 14.00   | 18.10    |
| Mean pH                   | 7.47    | 7.60    | 7.77    | 8.59    | 8.05     | 7.86     | 7.32     | 7.85     | 7.80    | 7.84    | 8.11     |
| Mean NPOC (mg/L)          | 3.16    | 3.14    | 3.27    | 2.42    | 3.22     | 2.54     | 4.42     | 2.78     | 2.31    | 2.88    | 3.60     |
| Mean TN (mg/L)            | 2.88    | 3.01    | 3.70    | 2.71    | 2.11     | 2.96     | 6.44     | 12.45    | 6.09    | 0.93    | 2.86     |
| Mean Cl (mg/L)            | 2.27    | 2.54    | 2.43    | -0.15   | 1.04     | 4.65     | 2.48     | 3.28     | 7.36    | 0.27    | 1.38     |
| Mean SO4 (mg/L)           | 615.21  | 606.25  | 627.59  | 245.59  | 586.26   | 689.55   | 994.01   | 784.53   | 424.57  | 469.90  | 881.02   |
| Mean NO3-N (mg/L)         | 1.88    | 2.50    | 2.53    | 2.10    | 1.53     | 2.03     | 5.08     | 10.74    | 4.23    | 0.34    | 2.47     |
| Mean Ca (mg/L)            | 128.00  | 133.30  | 141.90  | 53.25   | 120.21   | 132.13   | 249.34   | 226.51   | 115.85  | 72.76   | 147.34   |
| Mean Mg (mg/L)            | 100.22  | 109.23  | 110.10  | 39.79   | 114.34   | 90.00    | 175.67   | 109.05   | 46.48   | 77.43   | 146.33   |
| Mean Na (mg/L)            | 8.80    | 8.52    | 8.87    | 2.98    | 9.72     | 42.40    | 9.82     | 11.23    | 17.82   | 4.14    | 7.26     |
| Mean Fe (µg/L)            | 24.31   | 6.33    | 12.35   | 50.69   | 25.54    | 25.12    | 24.71    | 23.37    | 28.79   | 54.45   | 17.78    |
| Mean Ba (µg/L)            | 32.96   | 38.49   | 33.71   | 43.94   | 29.16    | 35.44    | 33.15    | 59.24    | 59.19   | 33.04   | 24.80    |
| Mean Mn (µg/L)            | 151.98  | 143.48  | 154.97  | 108.91  | 92.51    | 1110.92  | 46.12    | 184.60   | 666.51  | 170.68  | 80.20    |
| Mean Al (µg/L)            | 13.66   | 20.65   | 22.36   | 19.59   | 18.34    | 109.16   | 23.66    | 41.56    | 36.13   | 43.31   | 23.21    |
| Mean V (µg/L)             | 0.14    | 0.11    | 0.11    | 0.11    | 0.03     | 0.15     | 0.00     | 0.06     | 0.05    | 0.04    | 0.08     |
| Mean Co (µg/L)            | 0.46    | 0.50    | 0.61    | 0.35    | 0.53     | 3.60     | 0.34     | 2.43     | 4.33    | 0.56    | 0.23     |
| Mean Ni (µg/L)            | 4.44    | 3.92    | 4.84    | 2.62    | 4.42     | 35.08    | 4.45     | 12.69    | 19.47   | 1.68    | 3.39     |
| Mean Cu (µg/L)            | 0.63    | 0.73    | 0.39    | 1.58    | 0.41     | 0.59     | 0.82     | 1.18     | 1.40    | 5.40    | 0.44     |
| Mean Zn (µg/L)            | 9.18    | 8.33    | 6.34    | 10.85   | 9.76     | 11.19    | 15.72    | 8.78     | 9.34    | 3.97    | 8.02     |
| Mean Se (µg/L)            | 9.49    | 8.94    | 10.83   | 4.54    | 11.65    | 12.41    | 18.68    | 22.41    | 22.53   | 1.45    | 7.91     |
| Mean U (µg/L)             | 2.80    | 2.81    | 2.91    | 0.96    | 3.40     | 0.27     | 5.65     | 3.76     | 0.39    | 0.59    | 3.25     |
| Mean Sr (µg/L)            | 689.00  | 699.40  | 834.39  | 248.65  | 513.44   | 849.25   | 1570.31  | 2312.20  | 1326.89 | 194.96  | 451.16   |
| Mean Si (mg/L)            | 2.31    | 2.08    | 2.22    | 2.30    | 1.98     | 2.28     | 2.18     | 2.23     | 2.65    | 2.81    | 1.93     |
| Mean Li (µg/L)            | 23.61   | 21.99   | 23.44   | 9.26    | 20.92    | 28.63    | 34.65    | 28.32    | 21.68   | 7.81    | 20.14    |
| Mean B (µg/L)             | 31.90   | 23.67   | 34.79   | 22.08   | 19.46    | 38.85    | 39.35    | 46.79    | 47.63   | 22.56   | 24.46    |
| Mean Cr (µg/L)            | 0.02    | BDL     | 0.14    | 0.14    | 0.03     | 0.27     | 0.12     | 0.10     | 0.26    | BDL     | 0.09     |
| Biofilm C (µg/g dw)       | 106.10  | 70.89   | 81.32   | 19.49   | 80.15    | 80.50    | 41.47    | 100.10   | 223.90  | 45.65   | 54.84    |
| Biofilm Be (µg/g dw)      | 0.35    | 0.38    | 0.38    | 0.61    | 0.46     | 0.79     | 0.97     | 0.46     | 0.67    | 0.50    | 0.48     |
| Biofilm Na (mg/g dw)      | 34.23   | 60.24   | 55.84   | 57.75   | 55.27    | 170.16   | 131.15   | 47.46    | 50.06   | 60.84   | 40.24    |
| Biofilm Mg (mg/g dw)      | 1612.84 | 2075.89 | 1818.41 | 1724.57 | 2177.77  | 2687.82  | 4484.86  | 1059.63  | 1480.83 | 1763.57 | 1665.47  |
| Biofilm Al (µg/g dw)      | 2760.80 | 3410.29 | 3130.99 | 4776.43 | 2672.08  | 6197.36  | 4702.04  | 2718.85  | 4006.38 | 4264.00 | 3141.44  |
| Biofilm K (mg/g dw)       | 684.38  | 805.00  | 765.85  | 1106.23 | 717.60   | 1009.83  | 1836.06  | 644.82   | 956.66  | 1007.65 | 723.63   |
| Biofilm Ca (mg/g dw)      | 1908.99 | 2719.00 | 2443.22 | 900.64  | 25634.86 | 12577.95 | 61850.39 | 13206.89 | 1631.10 | 1095.09 | 10409.06 |
| Biofilm V (µg/g dw)       | 5.53    | 6.44    | 6.03    | 9.11    | 5.25     | 8.23     | 8.02     | 5.58     | 8.00    | 7.93    | 6.12     |
| Biofilm Cr (µg/g dw)      | 4.60    | 5.40    | 4.91    | 7.40    | 4.51     | 5.98     | 7.36     | 4.23     | 7.64    | 6.32    | 5.36     |
| Biofilm Mn (µg/g dw)      | 541.80  | 425.62  | 363.77  | 524.94  | 1404.22  | 19334.30 | 3133.66  | 754.96   | 869.05  | 580.90  | 505.40   |
| Biofilm Fe (mg/g dw)      | 11.00   | 11.97   | 11.31   | 16.39   | 12.02    | 12.50    | 15.69    | 8.65     | 14.61   | 14.76   | 13.02    |
| Biofilm Co (µg/g dw)      | 5.19    | 5.33    | 5.06    | 7.82    | 9.14     | 62.70    | 19.15    | 11.06    | 12.31   | 6.57    | 4.77     |
| Biofilm Ni (µg/g dw)      | 9.97    | 10.07   | 9.47    | 12.96   | 22.09    | 321.74   | 44.35    | 16.52    | 23.38   | 10.97   | 14.98    |
| Biofilm Cu (µg/g dw)      | 5.31    | 5.75    | 5.12    | 7.62    | 6.79     | 9.39     | 17.44    | 5.79     | 10.17   | 8.67    | 5.16     |
| Biofilm Zn (µg/g dw)      | 28.99   | 27.86   | 26.90   | 44.49   | 79.46    | 113.44   | 90.66    | 39.55    | 52.52   | 31.96   | 52.71    |
| Biofilm As (µg/g dw)      | 2.33    | 2.47    | 2.34    | 3.02    | 1.67     | 2.59     | 2.73     | 1.73     | 2.64    | 2.56    | 1.92     |
| Biofilm Sr (µg/g dw)      | 6.66    | 7.54    | 7.78    | 6.52    | 38.76    | 90.35    | 187.67   | 79.58    | 16.80   | 4.77    | 14.57    |
| Biofilm Mo (µg/g dw)      | 0.05    | 3.75    | 1.00    | 0.09    | 0.06     | 0.41     | 0.38     | 0.09     | 0.18    | 0.05    | 0.65     |
| Biofilm Cd (µg/g dw)      | 0.07    | 0.06    | 0.07    | 0.09    | 0.12     | 0.70     | 0.50     | 0.09     | 0.11    | 0.07    | 0.20     |
| Biofilm Ba (µg/g dw)      | 42.79   | 42.11   | 39.29   | 47.05   | 42.63    | 113.26   | 71.89    | 47.65    | 65.09   | 37.76   | 31.92    |
| Biofilm Pb (µg/g dw)      | 6.69    | 6.37    | 6.32    | 9.51    | 5.37     | 9.83     | 12.80    | 8.58     | 9.96    | 7.92    | 5.98     |
| Biofilm Th (µg/g dw)      | 8.32    | 7.90    | 7.70    | 6.74    | 2.58     | 4.11     | 4.46     | 2.62     | 4.91    | 6.61    | 3.97     |
| Biofilm U (µg/g dw)       | 0.81    | 0.76    | 0.76    | 1.13    | 0.45     | 0.65     | 1.23     | 0.60     | 0.59    | 0.76    | 0.45     |

Supplementary Table S2. Multiplex Identifier Adapters for GS FLX Titanium Chemistry (TCB No. 005-2009).

| Roche MID | Sequence   | Roche MID | Sequence   |
|-----------|------------|-----------|------------|
| MID-1     | ACGAGTGCGT | MID-6     | ATATCGCGAG |
| MID-2     | ACGCTCGACA | MID-7     | CGTGTCTCTA |
| MID-3     | AGACGCACTC | MID-8     | CTCGCGTGTC |
| MID-4     | AGCACTGTAG | MID-10    | TCTCTATGCG |
| MID-5     | ATCAGACACG | MID-11    | TGATACGTCT |

Supplementary Table S3. Environmental variables from PCA with Pearson correlation

coefficients (r) and loadings for each axis.

| Component 1             |          |                |                 | Component 2             |          |                |                 |
|-------------------------|----------|----------------|-----------------|-------------------------|----------|----------------|-----------------|
| <i>Variable</i>         | <i>r</i> | <i>p-value</i> | <i>loadings</i> | <i>Variable</i>         | <i>r</i> | <i>p-value</i> | <i>loadings</i> |
| Mean Lithium            | 0.971    | <0.001         | 0.253           | Mean Zinc               | 0.484    | <b>0.019</b>   | 0.231           |
| Mean Conductivity       | 0.966    | <0.001         | 0.251           | Mean Iron (log)         | 0.431    | <b>0.040</b>   | 0.200           |
| % Watershed Mined       | 0.962    | <0.001         | 0.250           | Mean Silicon            | 0.333    | 0.121          | 0.159           |
| Mean Calcium            | 0.957    | <0.001         | 0.249           | Biofilm Calcium (log)   | 0.300    | 0.164          | 0.143           |
| Mean Sulfate            | 0.950    | <0.001         | 0.247           | Mean pH                 | 0.287    | 0.184          | 0.137           |
| Mean Strontium (log)    | 0.939    | <0.001         | 0.244           | Mean Chloride (log)     | 0.262    | 0.227          | 0.125           |
| Mean Selenium (sqrt)    | 0.935    | <0.001         | 0.243           | Mean Vanadium           | 0.257    | 0.236          | 0.123           |
| Mean Magnesium          | 0.919    | <0.001         | 0.239           | Biofilm Magnesium       | 0.162    | 0.460          | 0.077           |
| Biofilm Calcium (log)   | 0.874    | <0.001         | 0.227           | Mean Nickel (log)       | 0.086    | 0.697          | 0.041           |
| Mean Uranium (log)      | 0.827    | <0.001         | 0.215           | % Watershed Mined       | 0.026    | 0.908          | 0.012           |
| Mean Boron (log)        | 0.818    | <0.001         | 0.213           | Mean Selenium (sqrt)    | -0.081   | 0.715          | -0.038          |
| Mean NPOC               | 0.794    | <0.001         | 0.207           | Mean Nitrate (log)      | -0.081   | 0.713          | -0.039          |
| Mean Nickel (log)       | 0.766    | <0.001         | 0.199           | Mean Lithium            | -0.085   | 0.699          | -0.041          |
| Mean Nitrate (log)      | 0.722    | <0.001         | 0.188           | Mean Calcium            | -0.111   | 0.614          | -0.053          |
| Biofilm Magnesium       | 0.680    | <0.001         | 0.177           | Mean Strontium (log)    | -0.173   | 0.429          | -0.083          |
| Mean Chloride (log)     | -0.136   | 0.538          | -0.035          | Mean Conductivity       | -0.180   | 0.411          | -0.086          |
| Biofilm Thorium         | -0.321   | 0.135          | -0.084          | Mean Boron (log)        | -0.196   | 0.371          | -0.093          |
| Mean pH                 | -0.333   | 0.120          | -0.087          | Mean NPOC               | -0.199   | 0.362          | -0.095          |
| Biofilm Zinc (inv)      | -0.371   | 0.082          | -0.096          | Mean Sulfate            | -0.200   | 0.360          | -0.095          |
| Biofilm Cadmium (inv)   | -0.379   | 0.075          | -0.099          | Mean Magnesium          | -0.218   | 0.318          | -0.104          |
| Mean Zinc               | -0.428   | <b>0.042</b>   | -0.111          | Mean Uranium (log)      | -0.387   | 0.068          | -0.185          |
| Biofilm Manganese (inv) | -0.447   | <b>0.033</b>   | -0.116          | Biofilm Strontium (inv) | -0.500   | <b>0.015</b>   | -0.239          |
| Biofilm Nickel (inv)    | -0.650   | <0.001         | -0.169          | Biofilm Thorium         | -0.654   | <b>0.001</b>   | -0.312          |
| Mean Iron (log)         | -0.755   | <0.001         | -0.206          | Biofilm Nickel (inv)    | -0.691   | <0.001         | -0.330          |
| Biofilm Strontium (inv) | -0.764   | <0.001         | -0.199          | Biofilm Manganese (inv) | -0.770   | <0.001         | -0.368          |
| Mean Silicon            | -0.796   | <0.001         | -0.207          | Biofilm Cadmium (inv)   | -0.878   | <0.001         | -0.419          |
| Mean Vanadium           | -0.837   | <0.001         | -0.218          | Biofilm Zinc (inv)      | -0.879   | <0.001         | -0.419          |

Supplementary Table S4. Correlations of environmental variables and relative abundances of bacteria from four different taxonomic levels: phylum, class, order, or family. Only taxa with  $r > |0.5|$  and  $p < 0.05$  shown. Table organized by 1) environmental variable, 2) taxonomic level at which the analysis was done, and 3) correlation coefficient.

| Environmental Variable | Phylum          | Class               | Order               | Family               | r      | p-value |
|------------------------|-----------------|---------------------|---------------------|----------------------|--------|---------|
| % Watershed Mined      | Actinobacteria  |                     |                     |                      | 0.633  | 0.002   |
| % Watershed Mined      | Acidobacteria   | Acidobacteria-5     |                     |                      | -0.679 | 0.001   |
| % Watershed Mined      | Proteobacteria  | Betaproteobacteria  |                     |                      | -0.663 | 0.001   |
| % Watershed Mined      | Acidobacteria   | Solibacteres        |                     |                      | -0.552 | 0.008   |
| % Watershed Mined      | Verrucomicrobia | Verrucomicrobiae    |                     |                      | 0.501  | 0.017   |
| % Watershed Mined      | Chloroflexi     | Anaerolineae        |                     |                      | 0.545  | 0.009   |
| % Watershed Mined      | Actinobacteria  | Acidimicrobiia      |                     |                      | 0.644  | 0.001   |
| % Watershed Mined      | Proteobacteria  | Betaproteobacteria  | YCC11               |                      | -0.678 | 0.001   |
| % Watershed Mined      | Proteobacteria  | Alphaproteobacteria | Ellin329            |                      | -0.642 | 0.001   |
| % Watershed Mined      | Acidobacteria   | Solibacteres        | Solibacterales      |                      | -0.56  | 0.007   |
| % Watershed Mined      | Proteobacteria  | Betaproteobacteria  | Burkholderiales     |                      | -0.546 | 0.009   |
| % Watershed Mined      | Proteobacteria  | Betaproteobacteria  | A21b                |                      | -0.525 | 0.012   |
| % Watershed Mined      | Proteobacteria  | Alphaproteobacteria | Rickettsiales       |                      | -0.524 | 0.012   |
| % Watershed Mined      | Verrucomicrobia | Verrucomicrobiae    | Verrucomicrobiales  |                      | 0.499  | 0.018   |
| % Watershed Mined      | Actinobacteria  | Acidimicrobiia      | Acidimicrobiales    |                      | 0.64   | 0.001   |
| % Watershed Mined      | Chloroflexi     | Anaerolineae        | SBR1031             |                      | 0.676  | 0.001   |
| % Watershed Mined      | Proteobacteria  | Alphaproteobacteria | Rhodobacterales     |                      | 0.83   | <0.001  |
| % Watershed Mined      | Proteobacteria  | Deltaproteobacteria | Bdellovibrionales   | Bacteriovoraceae     | -0.679 | 0.001   |
| % Watershed Mined      | Proteobacteria  | Betaproteobacteria  | A21b                | EB1003               | -0.627 | 0.002   |
| % Watershed Mined      | Proteobacteria  | Deltaproteobacteria | Myxococcales        | Polyangiaceae        | -0.523 | 0.013   |
| % Watershed Mined      | Proteobacteria  | Gammaproteobacteria | Alteromonadales     | OM60                 | -0.499 | 0.018   |
| % Watershed Mined      | Proteobacteria  | Alphaproteobacteria | Rhodobacterales     | Rhodobacteraceae     | 0.495  | 0.019   |
| % Watershed Mined      | Proteobacteria  | Betaproteobacteria  | Methylophilales     | Methylophilaceae     | 0.562  | 0.007   |
| % Watershed Mined      | Proteobacteria  | Deltaproteobacteria | Syntrophobacterales | Syntrophobacteraceae | 0.581  | 0.005   |
| % Watershed Mined      | Proteobacteria  | Deltaproteobacteria | Syntrophobacterales | Desulfobacteraceae   | 0.596  | 0.004   |
| % Watershed Mined      | Proteobacteria  | Gammaproteobacteria | FCPT525             | FCPT525              | 0.613  | 0.002   |
| % Watershed Mined      | Proteobacteria  | Gammaproteobacteria | Oceanospirillales   | Oleiphilaceae        | 0.64   | 0.001   |
| % Watershed Mined      | Proteobacteria  | Deltaproteobacteria | Myxococcales        | OM27                 | 0.678  | 0.001   |
| % Watershed Mined      | Proteobacteria  | Alphaproteobacteria | Rhizobiales         | Phyllobacteriaceae   | 0.758  | <0.001  |
| PCA1                   | Chloroflexi     |                     |                     |                      | 0.500  | 0.019   |
| PCA1                   | Actinobacteria  |                     |                     |                      | 0.591  | 0.004   |
| PCA1                   | Proteobacteria  | Betaproteobacteria  |                     |                      | -0.676 | 0.001   |
| PCA1                   | Acidobacteria   | Acidobacteria-5     |                     |                      | -0.606 | 0.003   |
| PCA1                   | Acidobacteria   | Solibacteres        |                     |                      | -0.572 | 0.005   |
| PCA1                   | Chlorobi        | Ignavibacteria      |                     |                      | 0.521  | 0.013   |
| PCA1                   | Chloroflexi     | Anaerolineae        |                     |                      | 0.556  | 0.007   |
| PCA1                   | Actinobacteria  | Acidimicrobiia      |                     |                      | 0.615  | 0.002   |
| PCA1                   | Proteobacteria  | Betaproteobacteria  | YCC11               |                      | -0.722 | 0.002   |
| PCA1                   | Proteobacteria  | Alphaproteobacteria | Ellin329            |                      | -0.655 | <0.001  |
| PCA1                   | Acidobacteria   | Solibacteres        | Solibacterales      |                      | -0.579 | 0.005   |
| PCA1                   | Proteobacteria  | Alphaproteobacteria | Rickettsiales       |                      | -0.578 | 0.005   |
| PCA1                   | Proteobacteria  | Betaproteobacteria  | Burkholderiales     |                      | -0.554 | 0.007   |
| PCA1                   | Actinobacteria  | Acidimicrobiia      | Acidimicrobiales    |                      | 0.61   | 0.003   |
| PCA1                   | Chloroflexi     | Anaerolineae        | SBR1031             |                      | 0.655  | <0.001  |
| PCA1                   | Proteobacteria  | Alphaproteobacteria | Rhodobacterales     |                      | 0.848  | <0.001  |
| PCA1                   | Proteobacteria  | Betaproteobacteria  | A21b                | EB1003               | -0.636 | 0.002   |
| PCA1                   | Proteobacteria  | Deltaproteobacteria | Bdellovibrionales   | Bacteriovoraceae     | -0.601 | 0.003   |
| PCA1                   | Proteobacteria  | Deltaproteobacteria | Myxococcales        | Polyangiaceae        | -0.507 | 0.016   |
| PCA1                   | Proteobacteria  | Gammaproteobacteria | FCPT525             | FCPT525              | 0.584  | 0.004   |
| PCA1                   | Proteobacteria  | Deltaproteobacteria | Syntrophobacterales | Desulfobacteraceae   | 0.601  | 0.003   |
| PCA1                   | Proteobacteria  | Gammaproteobacteria | Oceanospirillales   | Oleiphilaceae        | 0.614  | 0.002   |
| PCA1                   | Proteobacteria  | Betaproteobacteria  | Methylophilales     | Methylophilaceae     | 0.622  | 0.002   |
| PCA1                   | Proteobacteria  | Deltaproteobacteria | Syntrophobacterales | Syntrophobacteraceae | 0.624  | 0.002   |
| PCA1                   | Proteobacteria  | Alphaproteobacteria | Rhizobiales         | Phyllobacteriaceae   | 0.647  | 0.001   |
| PCA1                   | Proteobacteria  | Deltaproteobacteria | Myxococcales        | OM27                 | 0.655  | <0.001  |
| PCA2                   | Actinobacteria  |                     |                     |                      | 0.623  | 0.002   |
| PCA2                   | Acidobacteria   | Sva0725             |                     |                      | -0.524 | 0.012   |
| PCA2                   | Actinobacteria  | Actinobacteria      |                     |                      | 0.529  | 0.011   |
| PCA2                   | Acidobacteria   | Acidobacteria-6     | CCU21               |                      | -0.7   | <0.001  |
| PCA2                   | Actinobacteria  | Actinobacteria      | Actinomycetales     |                      | 0.524  | 0.012   |
| PCA2                   | Proteobacteria  | Gammaproteobacteria | Legionellales       |                      | 0.563  | 0.006   |
| PCA2                   | Proteobacteria  | Gammaproteobacteria | Legionellales       | Coxiellaceae         | -0.566 | 0.006   |
| PCA2                   | Proteobacteria  | Alphaproteobacteria | Rhizobiales         | Rhizobiaceae         | 0.647  | 0.001   |
